# Supplementary material
Source: Springer Nature journal article supplement (https://www.springermedizin.de/resource/supplementary/12943_2013_1241_MOESM11_ESM.pdf/9553012)

**A**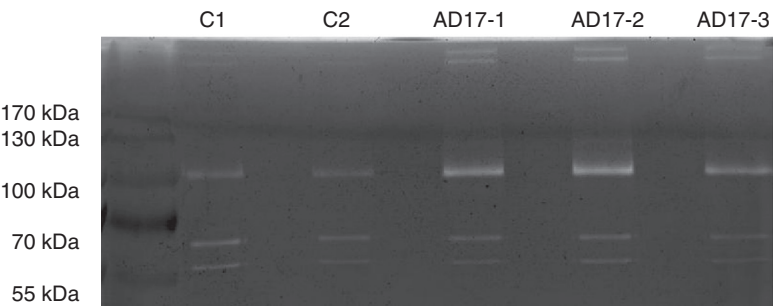**B**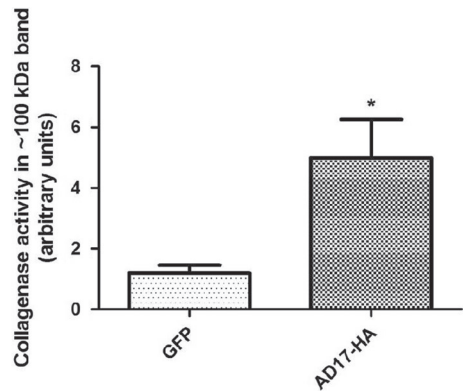**C**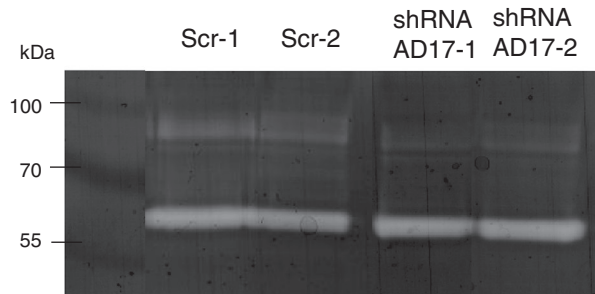**D**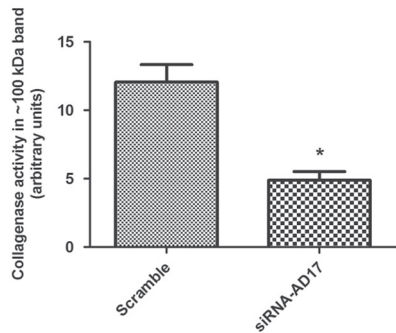

Supplement: MOESM11 [file 9553012]
